# Supplementary material
Source: PubMed Central journal article supplement (PMC2396449)
Supplement: NIHMS45119-supplement-01.pdf [file NIHMS45119-supplement-01.pdf]

**Synthesis, Electrochemistry, Geometric and Electronic Structure of Oxo-Molybdenum  
Compounds Involved in an Oxygen Atom Transferring System.**

Raghvendra S. Sengar, Victor N. Nemykin, and Partha Basu\*

**Supporting Information**

**Figure S1.** NMR Spectra of complexes:  $\text{Tp}^*\text{MoO}_2(\text{SPh})$ , **1** (brown),  $\text{Tp}^*\text{MoO}(\text{SPh})(\text{OPMe}_3)$ , **2** (green), and  $\text{Tp}^*\text{MoO}(\text{SPh})(\text{MeCN})$ , **3** (cyan) in acetonitrile- $d_3$  at room temperature.

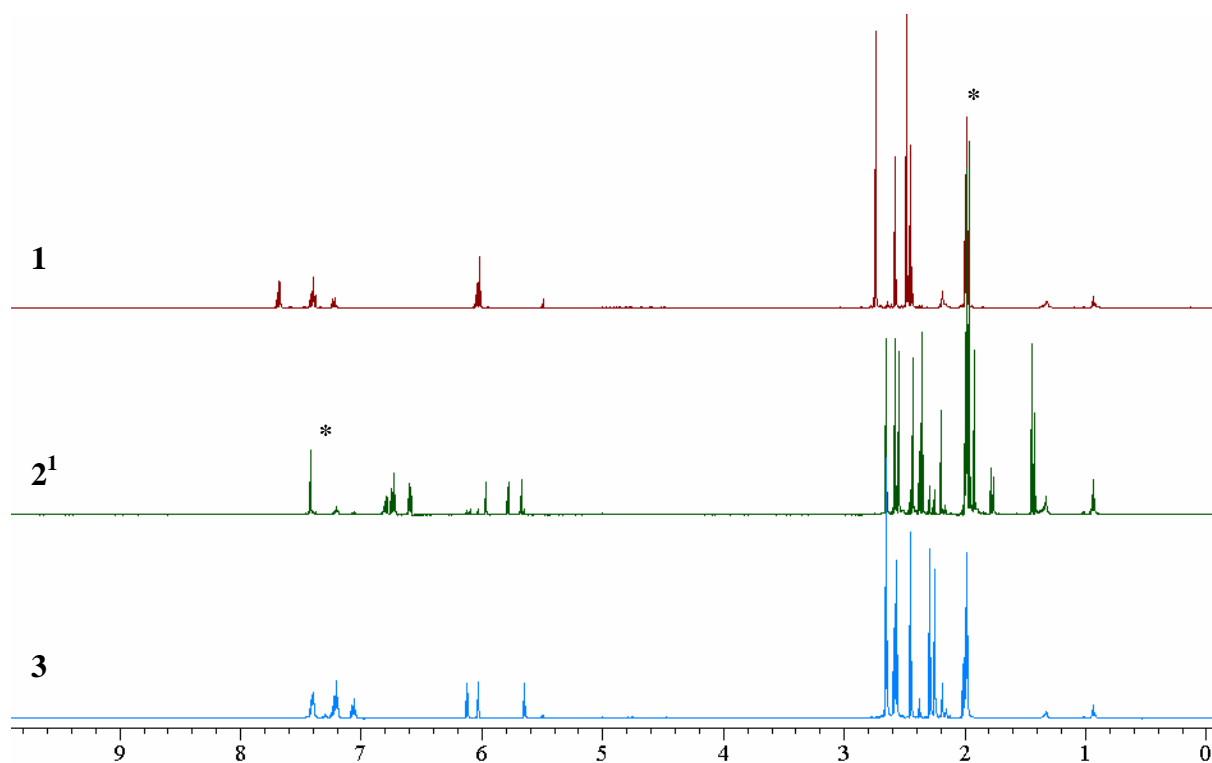

<sup>1</sup>Additional peaks are due to spontaneous conversion into **3**.

\*Solvent peak

**Figure S2:** Representation of Gaussian fit of a differential pulse voltammetric response of complex  $\text{Tp}^*\text{MoO}(\text{SPh})(\text{OPMe}_3)$  with  $R^2 = 99\%$ , the peak area obtained from the fit used in calculating the change in concentration as a function of time.

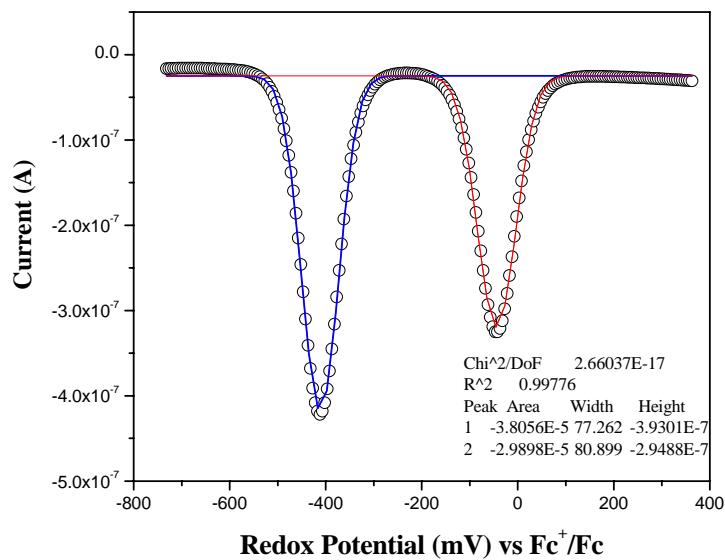

**Table 4** Calculated Energies and Orbital Compositions of **1**, **2**, and **3**.

| compd       | orbital          | energy<br>(eV) | orbital contribution %      |             |            |                   |             |             |
|-------------|------------------|----------------|-----------------------------|-------------|------------|-------------------|-------------|-------------|
|             |                  |                | Mo                          | Tp*         | O1         | O2                | S           |             |
| <b>1</b>    |                  |                | Mo                          | Tp*         | O1         | O2                | S           | phenyl      |
|             | e1 (LUMO+2)      | -2.210         | 68.8                        | 12.1        | 7.9        | 7.9               | 2.1         | 1.2         |
|             | d1<br>(LUMO+1)   | -2.843         | 67.8                        | 6.9         | 8.1        | 9.7               | 4.3         | 3.2         |
|             | c1 (LUMO)        | -3.346         | 64.7                        | 10.0        | 8.0        | 6.0               | 5.8         | 5.5         |
|             | <b>b1 (HOMO)</b> | <b>-6.135</b>  | <b>5.8</b>                  | <b>9.7</b>  | <b>1.4</b> | <b>4.3</b>        | <b>45.9</b> | <b>33.0</b> |
| a1 (HOMO-1) | -6.974           | 0.1            | 99.2                        | 0.0         | 0.1        | 0.1               | 0.5         |             |
| <b>2</b>    |                  |                | Mo                          | Tp*         | O1         | OPMe <sub>3</sub> | S           | phenyl      |
|             | e2 (LUMO+1)      | -1.232         | 63.4(d <sub>yz</sub> )      | 16.0        | 10.8       | 0.8               | 5.1         | 3.9         |
|             | d2 (LUMO)        | -1.522         | 65.4(d <sub>xz</sub> )      | 14.8        | 11.4       | 6.8               | 0.4         | 1.2         |
|             | <b>c2 (HOMO)</b> | <b>-4.678</b>  | <b>78.3(d<sub>xy</sub>)</b> | <b>9.4</b>  | <b>0.5</b> | <b>3.4</b>        | <b>4.6</b>  | <b>3.9</b>  |
|             | b2 (HOMO-1)      | -5.412         | 8.9                         | 7.8         | 2.7        | 1.7               | 45.0        | 33.9        |
| a2 (HOMO-2) | -6.420           | 6.4            | 49.3                        | 1.3         | 1.0        | 25.4              | 16.6        |             |
| <b>3</b>    |                  |                | Mo                          | Tp*         | O1         | MeCN              | S           | phenyl      |
|             | e3 (LUMO+1)      | -1.632         | 62.9(d <sub>yz</sub> )      | 14.2        | 11.0       | 0.4               | 5.3         | 6.2         |
|             | d3 (LUMO)        | -2.099         | 54.0(d <sub>xz</sub> )      | 12.1        | 12.0       | 20.8              | 0.4         | 0.4         |
|             | <b>c3 (HOMO)</b> | <b>-5.148</b>  | <b>71.0(d<sub>xy</sub>)</b> | <b>11.0</b> | <b>1.0</b> | <b>4.1</b>        | <b>8.1</b>  | <b>4.8</b>  |
|             | b3 (HOMO-1)      | -5.791         | 17.2                        | 9.8         | 3.2        | 2.7               | 43.8        | 23.3        |
| a3 (HOMO-2) | -6.375           | 16.3           | 7.9                         | 0.8         | 1.1        | 46.0              | 27.9        |             |

**Calculation Details**

Atomic Coordinates used for density functional calculations and basis set used:

**Compound 1:**

|    |          |          |          |
|----|----------|----------|----------|
| N  | 0.647    | -0.355   | 7.879    |
| N  | 1.745    | -0.456   | 7.056    |
| C  | 2.624    | -1.264   | 7.682    |
| C  | 2.081    | -1.655   | 8.88     |
| C  | 0.85     | -1.09    | 8.987    |
| C  | 3.926    | -1.641   | 7.11     |
| C  | -0.161   | -1.176   | 10.084   |
| B  | -0.604   | 0.385    | 7.39     |
| C  | -3.329   | -1.083   | 6.717    |
| N  | -0.215   | -0.332   | 4.998    |
| C  | -0.857   | -0.989   | 4.015    |
| C  | -2.093   | -1.375   | 4.465    |
| C  | -2.208   | -0.925   | 5.764    |
| N  | -1.061   | -0.296   | 6.078    |
| C  | -0.24    | -1.221   | 2.669    |
| N  | 0.648    | 2.124    | 6.117    |
| N  | -0.283   | 1.839    | 7.097    |
| C  | -0.798   | 2.988    | 7.573    |
| C  | -0.223   | 4.018    | 6.893    |
| C  | 0.672    | 3.452    | 5.989    |
| C  | 1.519    | 4.165    | 4.99     |
| C  | -1.822   | 3.028    | 8.647    |
| O  | 2.479    | -0.929   | 4.333    |
| Mo | 1.791    | 0.495    | 4.961    |
| C  | 4.799    | 1.871    | 4.385    |
| C  | 5.658    | 2.98     | 4.463    |
| C  | 6.535    | 3.203    | 3.412    |
| C  | 6.534    | 2.433    | 2.294    |
| C  | 5.687    | 1.379    | 2.242    |
| C  | 4.816    | 1.1      | 3.266    |
| S  | 3.755    | 1.594    | 5.801    |
| O  | 1.528    | 1.426    | 3.567    |
| H  | -1.37944 | 0.34746  | 8.1551   |
| H  | 2.54974  | -2.29871 | 9.6096   |
| H  | 4.52102  | -0.74396 | 6.93865  |
| H  | 3.77073  | -2.16016 | 6.16424  |
| H  | 4.45086  | -2.2982  | 7.80334  |
| H  | 0.27032  | -0.78814 | 11.00684 |
| H  | -0.45281 | -2.21623 | 10.22843 |
| H  | -1.03798 | -0.58636 | 9.81691  |
| H  | -3.5108  | -2.14347 | 6.89152  |
| H  | -4.22627 | -0.62405 | 6.30182  |
| H  | -3.07564 | -0.59786 | 7.65963  |
| H  | -2.83588 | -1.92678 | 3.90816  |
| H  | 0.67686  | -1.79906 | 2.78435  |
| H  | -0.00901 | -0.2621  | 2.20505  |

|   |          |          |         |
|---|----------|----------|---------|
| H | -0.93913 | -1.77056 | 2.03869 |
| H | -0.42259 | 5.07069  | 7.02864 |
| H | 2.18424  | 4.85742  | 5.50585 |
| H | 0.88061  | 4.71906  | 4.30183 |
| H | 2.11125  | 3.43967  | 4.43211 |
| H | -1.42334 | 2.55937  | 9.54675 |
| H | -2.7119  | 2.48972  | 8.32077 |
| H | -2.08265 | 4.06429  | 8.86208 |
| H | 5.63601  | 3.64028  | 5.31737 |
| H | 7.24206  | 4.01607  | 3.48544 |
| H | 7.19228  | 2.6559   | 1.46733 |
| H | 5.69637  | 0.73992  | 1.37143 |
| H | 4.13978  | 0.26214  | 3.18165 |

Basis set

Mo – DGDZVP

N, O, S – 6-311G(d)

H, C, B – 6-31G(d)

Energy, -5701.2112805 Hartree

Method – B3P86

**Compound, 2**

|    |       |        |       |
|----|-------|--------|-------|
| C  | 2.791 | 3.16   | 5.925 |
| C  | 6.795 | 2.521  | 6.715 |
| N  | 5.489 | 0.387  | 6.527 |
| N  | 5.279 | -0.736 | 7.314 |
| C  | 5.93  | -0.603 | 8.483 |
| C  | 6.564 | 0.614  | 8.462 |
| C  | 6.305 | 1.195  | 7.241 |
| C  | 5.934 | -1.661 | 9.551 |
| O  | 3.753 | 0.082  | 2.906 |
| C  | 8.413 | 1.627  | 1.891 |
| C  | 5.699 | 2.201  | 1.182 |
| C  | 7.049 | 3.806  | 3.12  |
| P  | 6.829 | 2.128  | 2.545 |
| O  | 6.379 | 1.19   | 3.632 |
| Mo | 4.506 | 0.431  | 4.374 |
| C  | 6.52  | -1.715 | 2.236 |
| C  | 6.219 | -3.595 | 3.975 |
| C  | 5.664 | -3.669 | 5.213 |
| N  | 5.161 | -2.423 | 5.505 |
| N  | 5.444 | -1.594 | 4.456 |
| C  | 6.069 | -2.297 | 3.527 |
| C  | 5.517 | -4.818 | 6.158 |
| B  | 4.458 | -1.919 | 6.762 |
| N  | 2.853 | -0.41  | 5.449 |
| N  | 3.041 | -1.407 | 6.414 |
| C  | 1.845 | -1.842 | 6.844 |
| C  | 0.859 | -1.164 | 6.183 |
| C  | 1.515 | -0.283 | 5.333 |
| C  | 1.722 | -2.894 | 7.904 |
| C  | 0.903 | 0.694  | 4.385 |
| S  | 4.001 | 2.752  | 4.744 |
| C  | 2.012 | 4.33   | 5.726 |
| C  | 1.051 | 4.702  | 6.631 |

|   |        |        |        |
|---|--------|--------|--------|
| C | 0.811  | 4.013  | 7.759  |
| C | 1.558  | 2.873  | 7.99   |
| C | 2.55   | 2.476  | 7.114  |
| H | 5.942  | 3.167  | 6.507  |
| H | 7.361  | 2.361  | 5.798  |
| H | 7.436  | 2.993  | 7.46   |
| H | 6.365  | -2.579 | 9.151  |
| H | 4.912  | -1.851 | 9.878  |
| H | 6.529  | -1.32  | 10.398 |
| H | 8.749  | 2.356  | 1.153  |
| H | 8.318  | 0.649  | 1.419  |
| H | 9.139  | 1.57   | 2.702  |
| H | 5.628  | 1.218  | 0.716  |
| H | 6.058  | 2.925  | 0.451  |
| H | 4.716  | 2.505  | 1.541  |
| H | 7.351  | 4.439  | 2.286  |
| H | 7.82   | 3.828  | 3.89   |
| H | 6.11   | 4.174  | 3.535  |
| H | 6.044  | -2.246 | 1.412  |
| H | 7.603  | -1.811 | 2.153  |
| H | 6.244  | -0.661 | 2.196  |
| H | 6.692  | -4.404 | 3.438  |
| H | 6.503  | -5.206 | 6.414  |
| H | 4.929  | -5.604 | 5.685  |
| H | 5.012  | -4.481 | 7.063  |
| H | 4.377  | -2.727 | 7.489  |
| H | -0.208 | -1.288 | 6.298  |
| H | 2.2    | -2.545 | 8.819  |
| H | 2.209  | -3.809 | 7.566  |
| H | 0.668  | -3.093 | 8.097  |
| H | 1.219  | 0.46   | 3.368  |
| H | 1.226  | 1.702  | 4.643  |
| H | -0.183 | 0.633  | 4.451  |
| H | 2.179  | 4.937  | 4.848  |
| H | 0.463  | 5.585  | 6.429  |
| H | 0.059  | 4.339  | 8.462  |
| H | 1.362  | 2.281  | 8.872  |
| H | 3.153  | 1.614  | 7.357  |
| H | 7.158  | 1.038  | 9.258  |

Basis set

Mo – DGDZVP

N, O, S – 6-311G(d)

H, C, B, P – 6-31G(d)

Energy, -6163.1684509 Hartree

Method – B3P86

**Compound, 3**

|    |        |       |        |
|----|--------|-------|--------|
| N  | 0.294  | 2.686 | 2.869  |
| S  | -0.744 | 3.94  | 0.186  |
| O  | 1.91   | 2.147 | 0.51   |
| Mo | 1.388  | 3.543 | 1.263  |
| N  | 2.373  | 4.865 | -0.072 |
| N  | 3.267  | 5.879 | 0.352  |
| C  | 3.797  | 6.461 | -0.676 |

|   |             |           |             |
|---|-------------|-----------|-------------|
| C | 3.293       | 5.923     | -1.855      |
| C | 2.43        | 4.95      | -1.442      |
| C | 1.675       | 4.026     | -2.225      |
| C | 4.785       | 7.622     | -0.574      |
| N | 3.228       | 3.657     | 2.466       |
| N | 3.98        | 4.791     | 2.518       |
| C | 5.076       | 4.529     | 3.262       |
| C | 5.055       | 3.271     | 3.644       |
| C | 3.881       | 2.727     | 3.147       |
| C | 3.333       | 1.316     | 3.33        |
| C | 6.095       | 5.619     | 3.551       |
| N | 1.101       | 5.607     | 2.49        |
| N | 2.177       | 6.496     | 2.492       |
| C | 1.82        | 7.618     | 3.157       |
| C | 0.538       | 7.497     | 3.533       |
| C | 0.097       | 6.242     | 3.094       |
| C | -1.217      | 5.654     | 3.317       |
| C | 2.785       | 8.783     | 3.314       |
| B | 3.52        | 6.093     | 1.844       |
| H | 4.059       | 7.13      | 1.939       |
| C | -2.821      | 0.634     | 1.231       |
| C | -1.846      | 1.48      | 0.765       |
| C | -1.986      | 2.859     | 0.84        |
| C | -3.172      | 3.34      | 1.368       |
| C | -4.168      | 2.539     | 1.827       |
| C | -3.995      | 1.138     | 1.792       |
| C | -0.353      | 2.264     | 3.722       |
| C | -1.158      | 1.783     | 4.804       |
| H | -0.859      | 2.179     | 5.673       |
| H | -1.061      | 0.788     | 4.841       |
| H | -2.116      | 2.018     | 4.643       |
| H | -3.307      | 4.33      | 1.412       |
| H | -5.002      | 2.947     | 2.199       |
| H | -4.708      | 0.532     | 2.145       |
| H | -2.669      | -0.354    | 1.201       |
| H | -1.024      | 1.101     | 0.339       |
| H | 3.530827    | 6.210299  | -2.868557   |
| H | 2.353679    | 3.411441  | -2.816448   |
| H | 1.007723    | 4.573859  | -2.890351   |
| H | 1.08697     | 3.387016  | -1.566198   |
| H | 5.664759    | 7.302419  | -0.01543808 |
| H | 4.311488    | 8.457856  | -0.05899417 |
| H | 5.083581    | 7.933985  | -1.574807   |
| H | 5.805451    | 2.761444  | 4.230154    |
| H | 3.180161    | 1.120396  | 4.391357    |
| H | 4.043825    | 0.5949711 | 2.926336    |
| H | 2.383253    | 1.223919  | 2.803121    |
| H | 5.611022    | 6.436321  | 4.085651    |
| H | 6.504915    | 5.991326  | 2.612148    |
| H | 6.899863    | 5.211059  | 4.162457    |
| H | -0.04438496 | 8.229218  | 4.072523    |
| H | -1.981109   | 6.294198  | 2.87611     |
| H | -1.395788   | 5.559623  | 4.388087    |
| H | -1.257294   | 4.668201  | 2.853667    |
| H | 3.069091    | 9.154686  | 2.329499    |
| H | 3.675077    | 8.448253  | 3.846736    |

|   |          |          |          |
|---|----------|----------|----------|
| H | 2.302432 | 9.580997 | 3.878295 |
|---|----------|----------|----------|

Basis set

Mo – DGDZVP

N, O, S – 6-311G(d)

H, C, B – 6-31G(d)

Energy, -5758.9417985 Hartree

Method – B3P86
